# Supplementary material for: Preparation of cis-pinane via α-pinene hydrogenation in water by using Ru nanoparticles immobilized in functionalized amphiphilic mesoporous silica
Source: Royal Society of Chemistry journal article supplement (doi:10.1039/c7ra09865k), 2017-01-01
Supplement: c7ra09865k1.pdf [file c7ra09865k1.pdf]

## **Preparation of *cis*-pinane via $\alpha$ -pinene hydrogenation in water by using Ru nanoparticles immobilized in functionalized amphiphilic mesoporous sieves**

Lihua Xie,<sup>a</sup> Xiaoyan Wang,<sup>a</sup> Fengli Yu,<sup>a</sup> Bing Yuan,<sup>a</sup> Congxia Xie<sup>\*a</sup> and Shitao Yu<sup>b</sup>

<sup>a</sup>*State Key Laboratory Base of Eco-chemical Engineering, College of Chemistry and Molecular Engineering, Qingdao University of Science and Technology, Qingdao 266042, Shandong, China*

<sup>b</sup>*College of Chemical Engineering, Qingdao University of Science and Technology, Qingdao 266042, Shandong, China*

*\*Corresponding author. Tel/Fax: +86-532-84022719; E-mail: xiecongxia@126.com*

### **Supporting Information**

#### **CONTENTS**

|                                                                                                                            |          |
|----------------------------------------------------------------------------------------------------------------------------|----------|
| <b>Fig. S1 The TEM images of amphiphilic molecular sieves synthesized under different conditions.....</b>                  | <b>2</b> |
| <b>Fig. S2 Particle size distribution of Ru nanoparticles.....</b>                                                         | <b>3</b> |
| <b>Fig. S3 The effect of stirring rate on the hydrogenation of <math>\alpha</math>-pinene.....</b>                         | <b>3</b> |
| <b>Fig. S4 The Arrhenius plot of <math>\alpha</math>-pinene hydrogenation at different temperatures over Ru/MF@MN.....</b> | <b>3</b> |
| <b>Fig. S5 The effects of five reaction parameters on <math>\alpha</math>-pinene hydrogenation.....</b>                    | <b>4</b> |

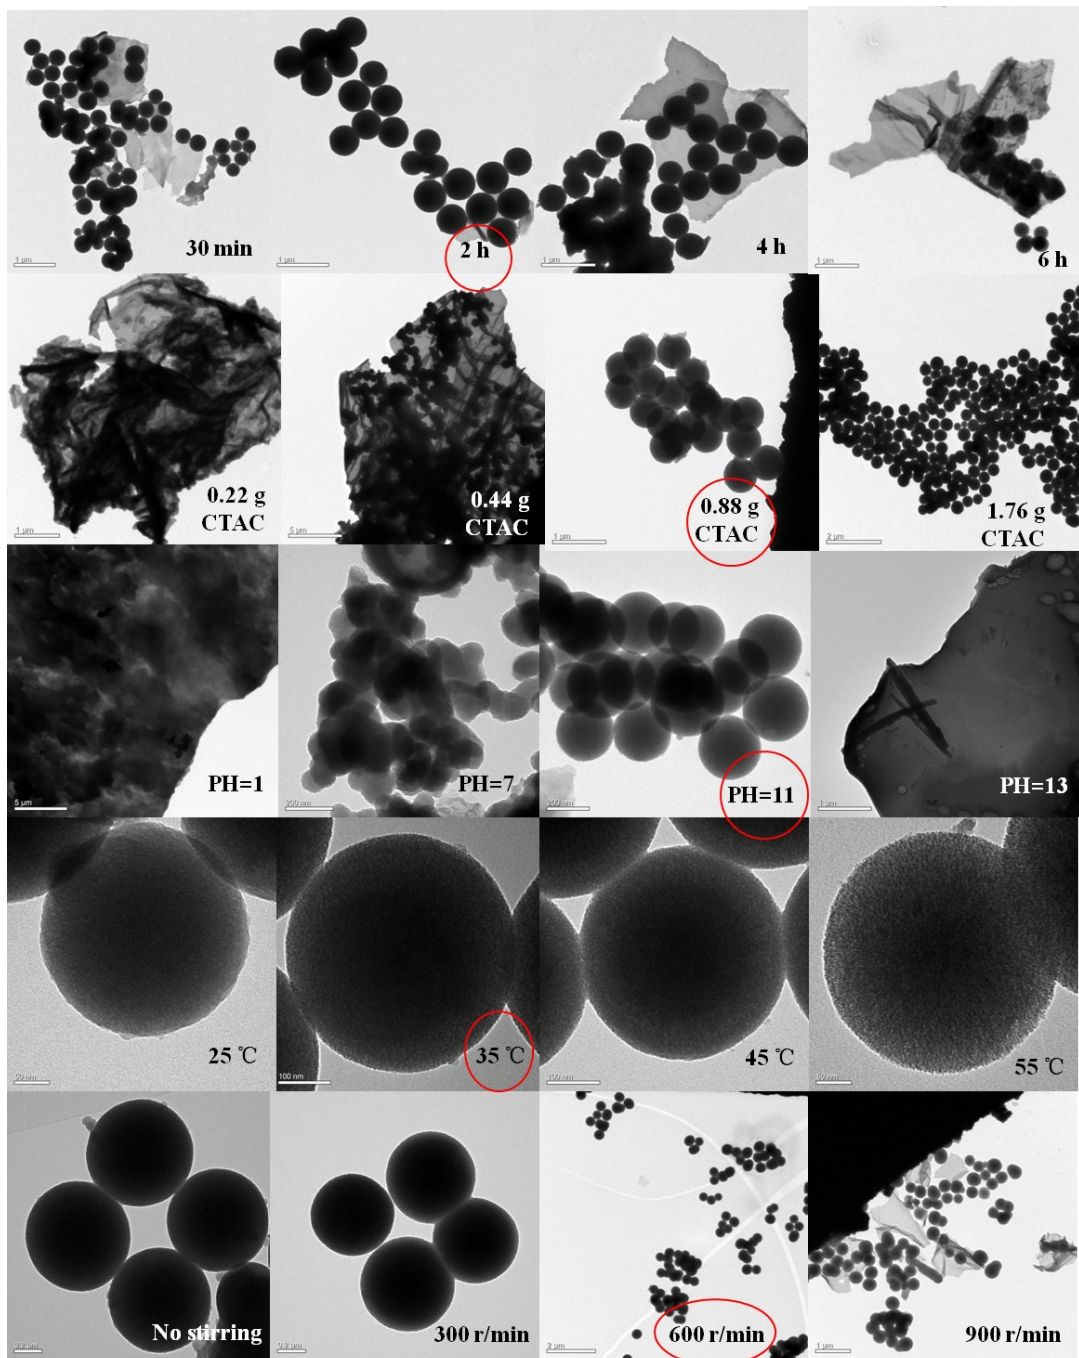

Fig. S1 The optimal synthetic conditions of amphilic molecular sieves.

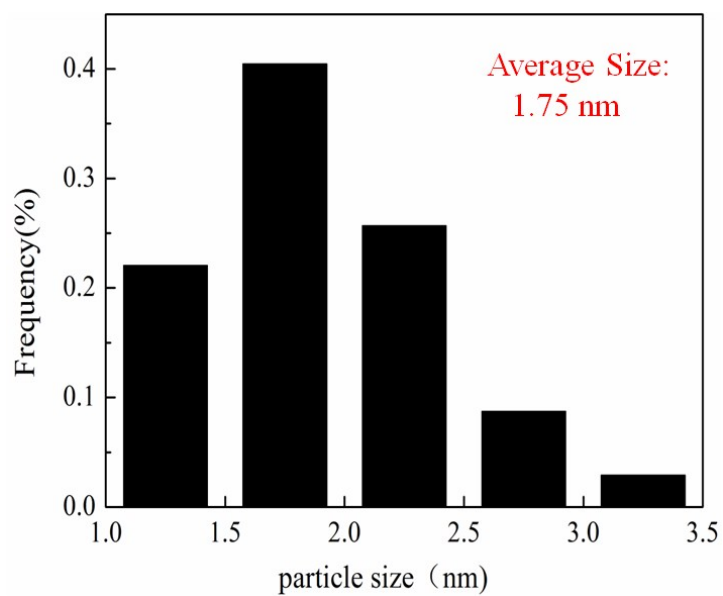

Fig. S2 The particle size distribution of Ru nanoparticles.

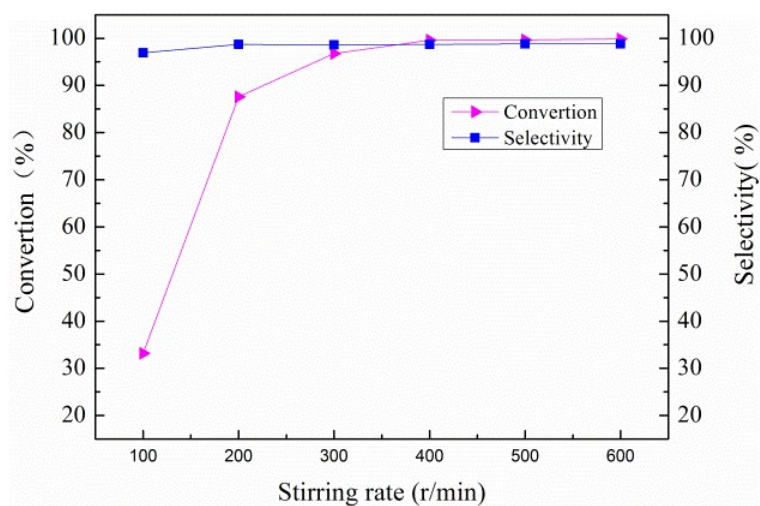

Fig. S3 The effect of stirring rate on the hydrogenation of  $\alpha$ -pinene.

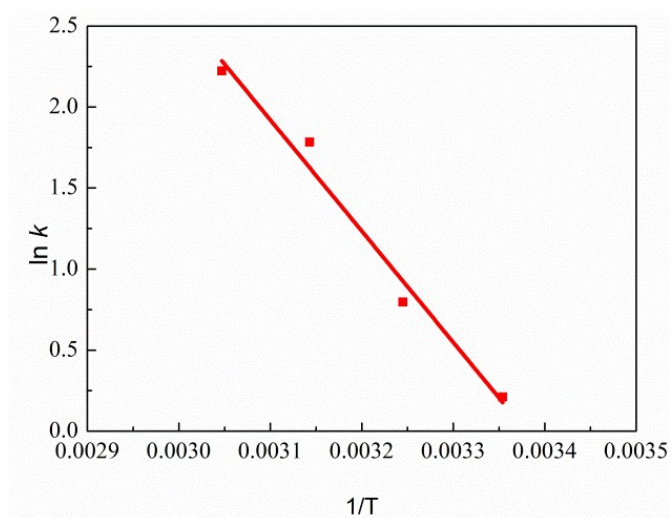

Fig. S4 The Arrhenius plot of  $\alpha$ -pinene hydrogenation at different temperatures over Ru/MF@MN catalyst.

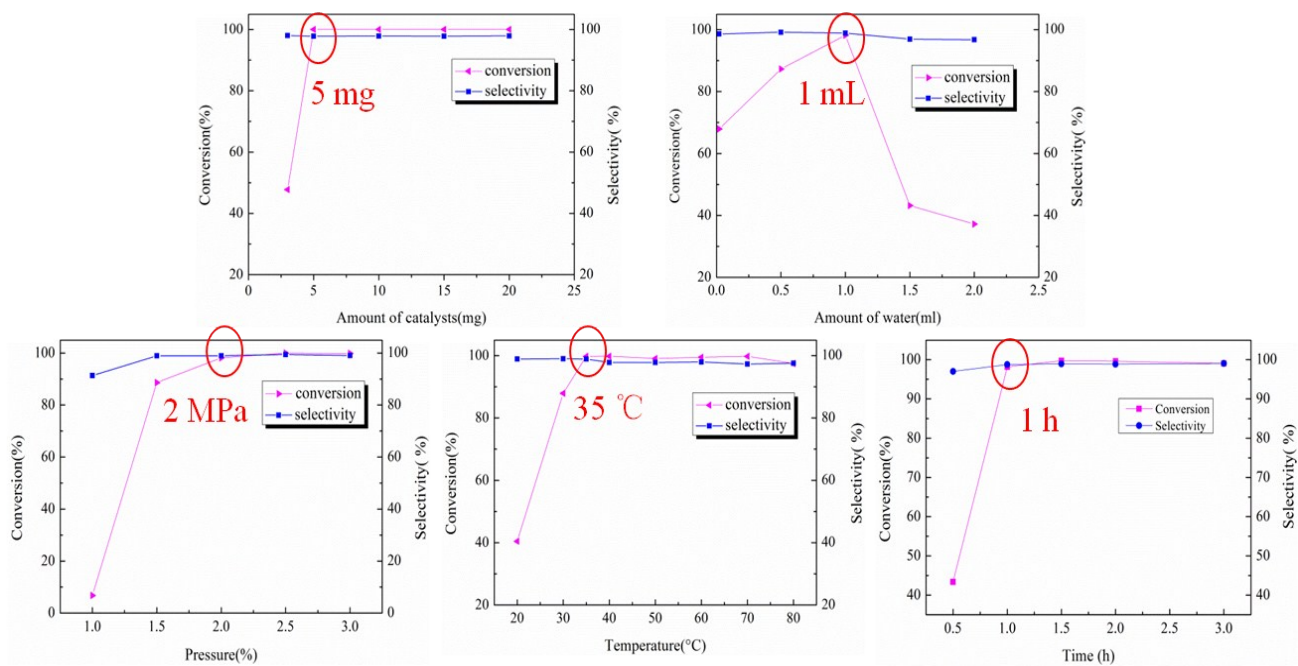

Fig. S5 The optimal reaction conditions of  $\alpha$ -pinene hydrogenation.
